# Supplementary material
Source: Springer Nature journal article supplement (https://www.springermedizin.de/resource/supplementary/12889_2012_4224_MOESM2_ESM.pdf/9491838)

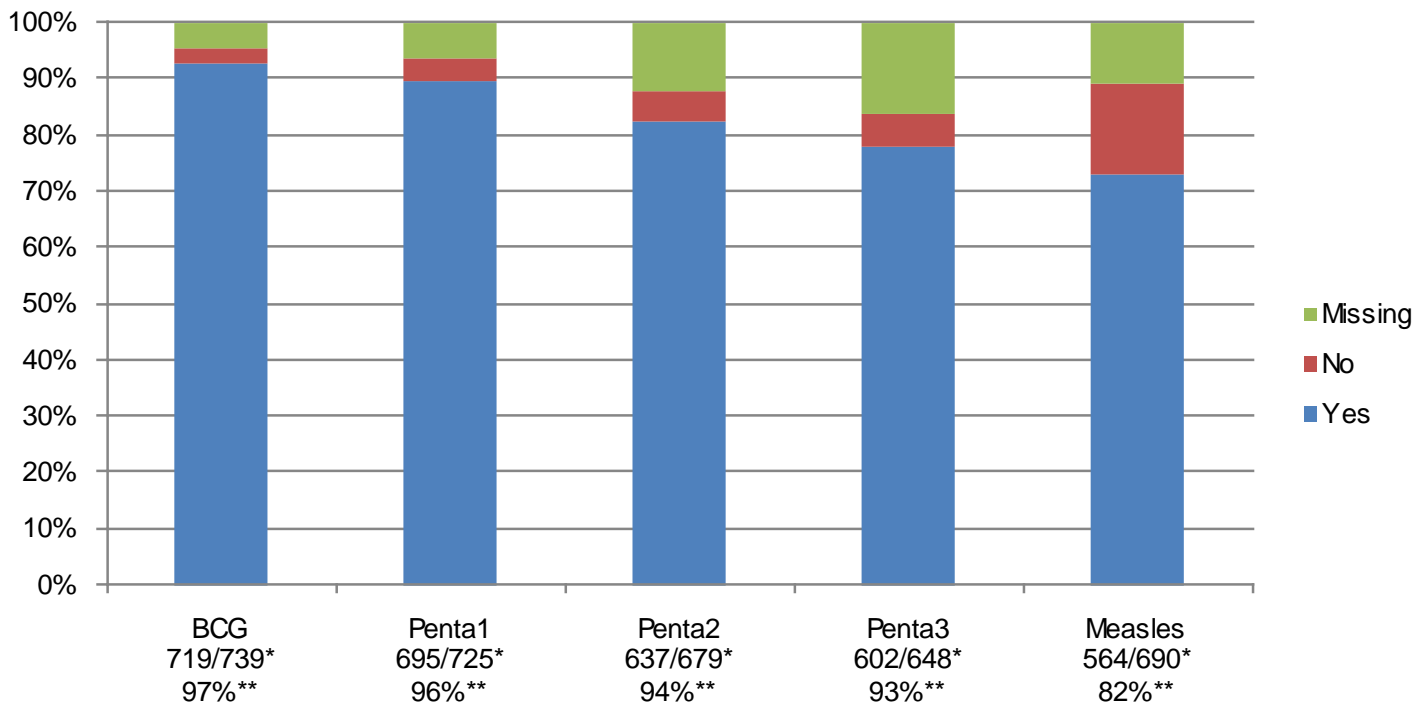

Supplement: MOESM2 [file 9491838]
